# Supplementary material for: Global research mapping of substance use disorder and treatment 1971–2017: implications for priority setting
Source: PubMed Central journal article supplement (PMC6525403; doi:10.1186/s13011-019-0204-7), 2019-05-17
Supplement: 13011_2019_204_MOESM1_ESM.pdf [file 13011_2019_204_MOESM1_ESM.pdf]

## Additional file 1

Figure S1. Selection of papers.

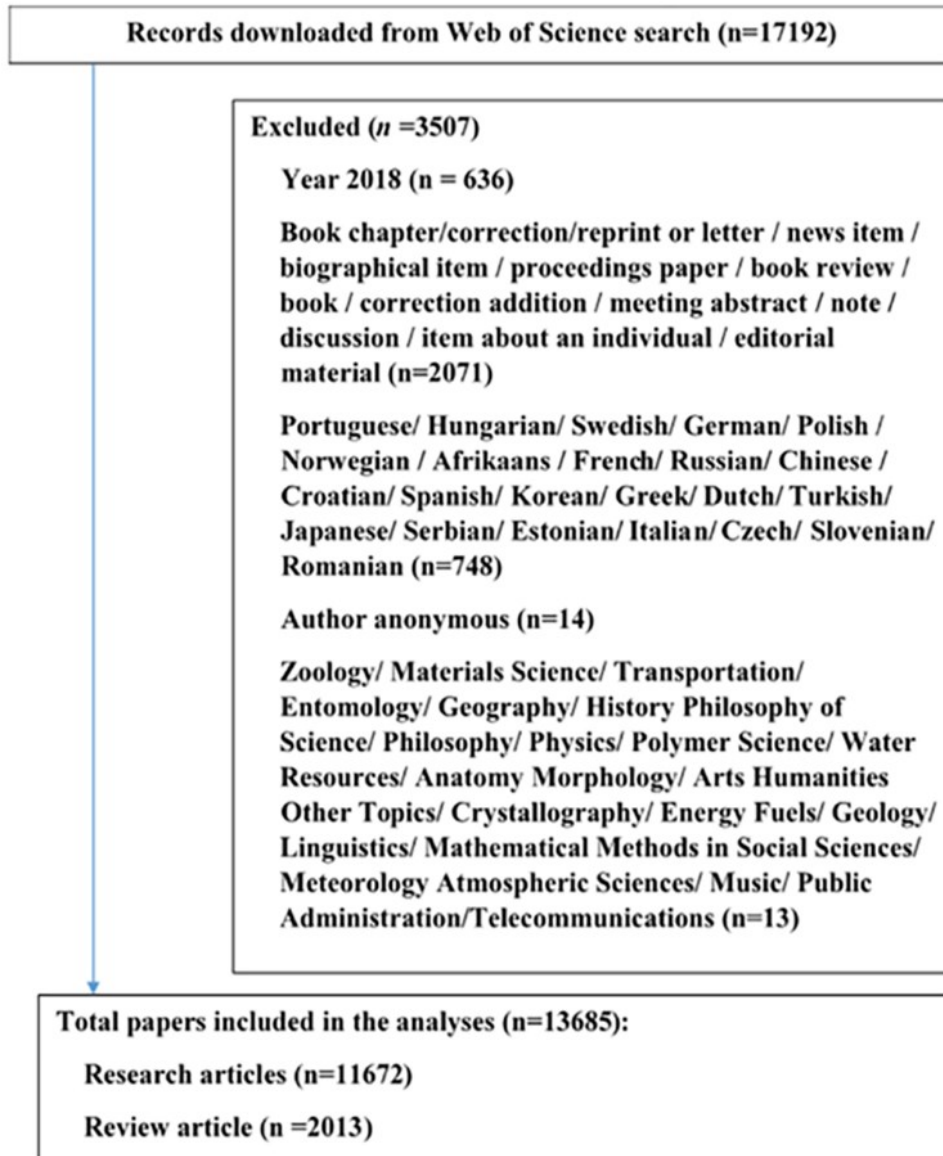

**Figure S1** shows the stepwise search strategy utilized in this study. Our initial search on the WOS yielded 17,192 results published between 1971 and 2017. This was reduced by 3507 results after applying our inclusion and inclusion criteria. After this removal of unrelated data, our search yielded 13,685 substance abuse related research papers. Of these, 11,672 were original articles, and 2,013 were reviews.

**Table S1. Most prolific Institution/Organizations**

| <b>No</b> | <b>Institutions/organizations</b>                    | <b>Number</b> | <b>%</b> | <b>Country</b> | <b>Citation</b> | <b>Citations per paper</b> | <b>h-index</b> |
|-----------|------------------------------------------------------|---------------|----------|----------------|-----------------|----------------------------|----------------|
| 1         | University of California System                      | 896           | 6.5      | United States  | 33696           | 37.6                       | 89             |
| 2         | Yale University                                      | 635           | 4.6      | United States  | 23810           | 37.5                       | 78             |
| 3         | Harvard University                                   | 553           | 4.0      | United States  | 20668           | 37.4                       | 69             |
| 4         | University of Pennsylvania                           | 456           | 3.3      | United States  | 18471           | 40.5                       | 67             |
| 5         | Johns Hopkins University                             | 441           | 3.2      | United States  | 15480           | 35.1                       | 66             |
| 6         | VA Boston Healthcare System                          | 401           | 2.9      | United States  | 15489           | 38.6                       | 62             |
| 7         | University of London                                 | 370           | 2.7      | England        | 15550           | 42.0                       | 61             |
| 8         | Brown University                                     | 366           | 2.7      | United States  | 13996           | 38.2                       | 66             |
| 9         | Columbia University                                  | 366           | 2.7      | United States  | 14987           | 41.0                       | 64             |
| 10        | National Institutes of Health NIH                    | 362           | 2.6      | United States  | 15737           | 43.5                       | 65             |
| 11        | University of Texas System                           | 360           | 2.6      | United States  | 9692            | 26.9                       | 51             |
| 12        | Pennsylvania Commonwealth System of Higher Education | 356           | 2.6      | United States  | 13413           | 37.7                       | 56             |
| 13        | University of California Los Angeles                 | 352           | 2.6      | United States  | 12233           | 34.8                       | 58             |
| 14        | University of California San Francisco               | 340           | 2.5      | United States  | 13781           | 40.5                       | 63             |
| 15        | University of Washington                             | 311           | 2.3      | United States  | 11348           | 36.5                       | 52             |
| 16        | University of Washington Seattle                     | 307           | 2.2      | United States  | 11314           | 36.9                       | 52             |
| 17        | University of Toronto                                | 262           | 1.9      | Canada         | 7448            | 28.4                       | 45             |
| 18        | State University System of Florida                   | 236           | 1.7      | United States  | 5514            | 23.4                       | 37             |
| 19        | US Department of Veteran Affairs                     | 236           | 1.7      | United States  | 7083            | 30.0                       | 39             |
| 20        | NIH National Institute on Drug Abuse                 | 235           | 1.7      | United States  | 9654            | 41.1                       | 51             |
| 21        | University System of Maryland                        | 230           | 1.7      | United States  | 7921            | 34.4                       | 44             |
| 22        | University of Pittsburgh                             | 228           | 1.7      | United States  | 8488            | 37.2                       | 49             |
| 23        | University of Minnesota System                       | 221           | 1.6      | United States  | 7710            | 34.9                       | 45             |

|    |                                     |     |     |               |      |      |    |
|----|-------------------------------------|-----|-----|---------------|------|------|----|
| 24 | University of Minnesota Twin Cities | 220 | 1.6 | United States | 7702 | 35.0 | 45 |
| 25 | Massachusetts General Hospital      | 204 | 1.5 | United States | 8857 | 43.4 | 48 |
| 26 | Stanford University                 | 202 | 1.5 | United States | 7839 | 38.8 | 50 |

The most prolific institutions are presented in **Table S1**. Institutions included in **Table S1** were required to have a minimum of 200 publications attributed to them. This attribution was determined based on the affiliation of the first author of each article. Among 26 universities/organizations, 24 located in the United States. The University of California System was the most prolific entity within our dataset, scoring highest in terms of publication volume, number of total citations and their h-index. Massachusetts General Hospital had the highest number of citations per paper with 43.4. Among these institutions, only two were located outside of the United States. These included the University of London (United Kingdom) and the University of Toronto (Canada).

**Table S2. Most cited papers**

| Rank | Paper                                                                                                                                                                                                                                                                                                                                                                                  | Total citation | Citations/year |
|------|----------------------------------------------------------------------------------------------------------------------------------------------------------------------------------------------------------------------------------------------------------------------------------------------------------------------------------------------------------------------------------------|----------------|----------------|
| 1    | Hayes, SC; Luoma, JB; Bond, FW; Masuda, A; Lillis, J. Acceptance and commitment therapy: Model, processes and outcomes. Behavior Research and Therapy.2006;44:1-25                                                                                                                                                                                                                     | 1482           | 134.7          |
| 2    | Durlak, JA; DuPre, EP. Implementation matters: A review of research on the influence of implementation on program outcomes and the factors affecting implementation. American Journal of Community Psychology.2008;41:327-350                                                                                                                                                          | 1345           | 149.4          |
| 3    | Prince, M; Patel, V; Saxena, S; Maj, M; Maselko, J; Phillips, MR; Rahman, A. Global mental health 1 - No health without mental health. Lancet.2007;370:859-877                                                                                                                                                                                                                         | 1245           | 124.5          |
| 4    | Aldao, A; Nolen-Hoeksema, S; Schweizer, S. Emotion-regulation strategies across psychopathology: A meta-analytic review. Clinical Psychology Review.2010;30:217-237                                                                                                                                                                                                                    | 1214           | 173.4          |
| 5    | Chou, R; Fanciullo, GJ; Fine, PG; Adler, JA; Ballantyne, JC; Davies, P; Donovan, MI; Fishbain, DA; Foley, KM; Fudin, J; Gilson, AM; Kelter, A; Mauskop, A; O'Connor, PG; Passik, SD; Pasternak, GW; Portenoy, RK; Rich, BA; Roberts, RG; Todd, KH; Miaskowski, C.Clinical Guidelines for the Use of Chronic Opioid Therapy in Chronic Non-cancer Pain.Journal of Pain. 2009;10:113-130 | 1112           | 139.0          |
| 6    | Jorenby, DE; Leischow, SJ; Nides, MA; Rennard, SI; Johnston, JA; Hughes, AR; Smith, SS; Muramoto, ML; Daughton, DM; Doan, K; Fiore, MC; Baker, TB. A controlled trial of sustained-release bupropion, a nicotine patch, or both for smoking cessation.New England Journal of Medicine.1999;340:685-691                                                                                 | 1012           | 56.2           |
| 7    | Jorenby, DE; Hays, JT; Rigotti, NA; Azoulay, S; Watsky, EJ; Williams, KE; Billing, CB; Gong, J; Reeves, KR.Efficacy of varenicline, an alpha 4 beta 2 nicotinic acetylcholine receptor partial agonist, vs placebo or sustained-release bupropion for smoking cessation - A randomized controlled trial. Jama- Journal of The American Medical Association.2006;296:56-63              | 898            | 81.6           |
| 8    | Gonzales, D; Rennard, SI; Nides, M; Oncken, C; Azoulay, S; Billing, CB; Watsky, EJ; Gong, J; Williams, KE; Reeves, KR. Varenicline, an alpha 4 beta 2 nicotinic acetylcholine receptor partial agonist, vs sustained-release bupropion and placebo for smoking cessation - A randomized controlled trial. Jama Journal of The American Medical Association.2006;296:47-55              | 884            | 80.4           |
| 9    | Hurt, RD; Sachs, DPL; Glover, ED; Offord, KP; Johnston, JA; Dale, LC; Khayrallah, MA; Schroeder, DR; Glover, PN; Sullivan, CR; Croghan, IT; Sullivan, PM.A comparison of sustained-release bupropion and placebo for smoking cessation. New England Journal of Medicine. 1997;337:1195-1202                                                                                            | 872            | 43.6           |
| 10   | Noar, SM; Benac, CN; Harris, MS. Does tailoring matter? Meta-analytic review of tailored print health Behavior change interventions. Psychological Bullentin.2007;133:673-693                                                                                                                                                                                                          | 822            | 82.2           |

| Rank | Paper                                                                                                                                                                                                                                                                                                                                                                                                              | Total citation | Citations/year |
|------|--------------------------------------------------------------------------------------------------------------------------------------------------------------------------------------------------------------------------------------------------------------------------------------------------------------------------------------------------------------------------------------------------------------------|----------------|----------------|
| 11   | Rubak, S; Sandboek, A; Lauritzen, T; Christensen, B. Motivational interviewing: a systematic review and meta-analysis. <i>British Journal of General Practice</i> .2005;55:305-312                                                                                                                                                                                                                                 | 809            | 67.4           |
| 12   | Burke, BL; Arkowitz, H; Menchola, M. The efficacy of motivational interviewing: A meta-analysis of controlled clinical trials. <i>Journal of Consulting and Clinical Psychology</i> .2003;71:843-861                                                                                                                                                                                                               | 796            | 56.9           |
| 13   | Bickel, WK; Odum, AL; Madden, GJ. Impulsivity and cigarette smoking: delay discounting in current, never, and ex-smokers. <i>Psychopharmacology</i> .1999;146:447-454                                                                                                                                                                                                                                              | 730            | 40.6           |
| 14   | Bond, C; LaForge, KS; Tian, MT; Melia, D; Zhang, SW; Borg, L; Gong, JH; Schluger, J; Strong, JA; Leal, SM; Tischfield, JA; Kreek, MJ; Yu, L. Single-nucleotide polymorphism in the human mu opioid receptor gene alters beta-endorphin binding and activity: Possible implications for opiate addiction. <i>Proceedings of the National Academy of Sciences of The United States of America</i> .1998;95:9608-9613 | 729            | 38.4           |
| 15   | Hughes, JR; Keely, J; Naud, S. Shape of the relapse curve and long-term abstinence among untreated smokers. <i>ADDICTION</i> .2004;99:29-38                                                                                                                                                                                                                                                                        | 676            | 52.0           |
| 16   | Stead, LF; Perera, R; Mant, D; Lancaster, T. Nicotine replacement therapy for smoking cessation (Review). <i>Cochrane Database of Systematic Reviews</i> .2008.                                                                                                                                                                                                                                                    | 623            | 69.2           |
| 17   | Putnam, FW. Ten-year research update review: Child sexual abuse. <i>Journal of American Academy of Child and Adolescent Psychiatry</i> .2003;42:269-278                                                                                                                                                                                                                                                            | 621            | 44.4           |
| 18   | Verdejo-Garcia, A; Lawrence, AJ; Clark, L. Impulsivity as a vulnerability marker for substance-use disorders: Review of findings from high-risk research, problem gamblers and genetic association studies. <i>Neuroscience and Biobehavioral Reviews</i> .2008;32:777-810                                                                                                                                         | 611            | 67.9           |
| 19   | Chang, ET; Adami, HO.The enigmatic epidemiology of nasopharyngeal carcinoma. <i>Cancer Epidemiology Biomarkers &amp; Prevention</i> .2006;15:1765-1777                                                                                                                                                                                                                                                             | 606            | 55.1           |
| 20   | Kendler, Ks; Neale, Mc; Maclean, Cj; Heath, Ac; Eaves, Lj; Kessler, Rc. Smoking and major depression - a causal-analysis. <i>Archives of General Psychiatry</i> .1993;50:36-43                                                                                                                                                                                                                                     | 600            | 25.0           |
| 21   | Jeffery, RW; Drewnowski, A; Epstein, LH; Stunkard, AJ; Wilson, GT; Wing, RR; Hill, DR. Long-term maintenance of weight loss: Current status. <i>Health Psychology</i> .2000;19:5-16                                                                                                                                                                                                                                | 595            | 35.0           |
| 22   | Mclellan, At; Arndt, lo; Metzger, Ds; Woody, Ge; O'Brien, Cp. The Effects of Psychosocial Services In Substance-Abuse Treatment. <i>JAMA-Journal of The American Medical Association</i> . 1993;269:1953-1959                                                                                                                                                                                                      | 595            | 24.8           |
| 23   | Coe, JW; Brooks, PR; Vetelino, MG; Wirtz, MC; Arnold, EP; Huang, JH; Sands, SB; Davis, TI; Lebel, LA; Fox, CB; Shrikhande, A; Heym, JH; Schaeffer, E; Rollema, H; Lu, Y; Mansbach, RS; Chambers, LK; Rovetti, CC; Schulz, DW; Tingley, FD; O'Neill, BT. Varenicline: An alpha 4 beta 2 nicotinic receptor partial agonist for smoking cessation. <i>Journal of Medicinal Chemistry</i> .2005;48:3474-3477          | 591            | 49.3           |
| 24   | Ramsay, DJ; Bowman, MA; Greenman, PE; Jiang, SP; Kushi, LH; Leeman, S; Lin, KM; Moerman, DE; Schnoll, SH; Walker, M; Waternaux,                                                                                                                                                                                                                                                                                    | 567            | 29.8           |

| Rank | Paper                                                                                                                                                                                                                                                                                                                                                                                                                                                                         | Total citations | Citations/year |
|------|-------------------------------------------------------------------------------------------------------------------------------------------------------------------------------------------------------------------------------------------------------------------------------------------------------------------------------------------------------------------------------------------------------------------------------------------------------------------------------|-----------------|----------------|
|      | C; Wisneski, LA. Acupuncture. JAMA Journal of The American Medical Association.1998;280:1518-1524                                                                                                                                                                                                                                                                                                                                                                             |                 |                |
| 25   | Proctor, E; Silmere, H; Raghavan, R; Hovmand, P; Aarons, G; Bunger, A; Griffey, R; Hensley, M. Outcomes for Implementation Research: Conceptual Distinctions, Measurement Challenges, and Research Agenda. Administration and Policy in Mental Health and Mental Health Services Research.2011;38:65-76                                                                                                                                                                       | 546             | 91.0           |
| 26   | West, R; McNeill, A; Raw, M. Smoking cessation guidelines for health professionals: an update.Thorax.2000;55:987-999                                                                                                                                                                                                                                                                                                                                                          | 539             | 31.7           |
| 27   | Miller, WR; Rose, GS. Toward a Theory of Motivational Interviewing. American Psychologist.2009;64:527-537                                                                                                                                                                                                                                                                                                                                                                     | 532             | 66.5           |
| 28   | Fiore, MC; Bailey, WC; Cohen, SJ; Dorfman, SF; Fox, BJ; Goldstein, MG; Gritz, E; Hasselblad, V; Heyman, RB; Jaen, CR; Jorenby, D; Kottke, TE; Lando, HA; Mecklenburg, RE; Mullen, PD; Nett, L; Piper, M; Robinson, L; Stitzer, M; Tommasello, A; Welsch, S; Villejo, L; Wewers, ME; Baker, TB. A clinical practice guideline for treating tobacco use and dependence - A US Public Health Service report. Jama Journal of The American Medical Association.2000;283:3244-3254 | 521             | 30.6           |
| 29   | Prochaska, Jo; Diclemente, Cc; Velicer, Wf; Rossi, Js. Standardized, Individualized, Interactive, and Personalized Self-help Programs for Smoking Cessation. Health Psychology.1993;12:399-405                                                                                                                                                                                                                                                                                | 521             | 21.7           |
| 30   | Brooner, RK; King, VL; Kidorf, M; Schmidt, CW; Bigelow, GE. Psychiatric and substance use comorbidity among treatment-seeking opioid abusers.Archives of General Psychiatry.1997;54:71-80                                                                                                                                                                                                                                                                                     | 511             | 25.6           |
| 31   | Herz, A.Endogenous opioid systems and alcohol addiction. Psychopharmacology.1997;129:99-111                                                                                                                                                                                                                                                                                                                                                                                   | 510             | 25.5           |
| 32   | Dunn, C; Deroo, L; Rivara, FP. The use of brief interventions adapted from motivational interviewing across behavioral domains: a systematic review. Addiction.2001;96:1725-1742                                                                                                                                                                                                                                                                                              | 506             | 31.6           |
| 33   | Miller, WR; Yahne, CE; Moyers, TB; Martinez, J; Pirritano, M.A randomized trial of methods to help clinicians learn motivational interviewing. Journal of Consulting and Clinical Psychology.2004;72:1050-1062                                                                                                                                                                                                                                                                | 500             | 38.5           |

**Table S2** lists the top 33 papers with the highest number of citations. In total, all papers included in our dataset received 388,139 citations. Over 719 papers had more than 100 citations. Twenty-three journals published the top 33 papers included in our list. The most popular journals used by these high profile papers included JAMA Journal of the American Medical Association, followed by Addiction, Archives of general psychiatry, Health Psychology, New England Journal of Medicine, Psychopharmacology, each of which contained two papers. **Table S2** also shows that these high profile papers were concerned with the following topics: **smoking and tobacco withdrawal** (paper number 1, 2, 6, 7, 8, 9,15,16,19, 20, 21, 23, 24, 26 and 29 in Table S2); **drug abuse** (paper number 4,13, 18, 22, 25, and 30 in Table 2); **alcohol addiction** (paper number 31, 32, and 33 in Table S2); **behavioral therapy** (paper number 1, 2, 3, 5 and 13 in Table S2); **nicotine replacement treatment** (paper number 6, 7, 9, 15, 16 and 28 in Table S2); **motivational interviewing** (paper number 11 and 27 in Table S2); **non-nicotine medication** (paper number

23 in Table S2); **acupuncture** (paper number 24 in Table S2); **methadone maintenance** (paper number 30 in Table S2); and **self-help** (paper number 29 in Table S2).





**Figure S2** points out the keyword co-occurrence which is a measure of the probability that a particular word appears on the Web of Science search results. The thickness of lines is the strength of the relationship between keywords relative to the others. The strength of these relationships was determined by the frequency with which they appeared together in published articles. The position of a key word within this constellation represents how interrelated and frequent its co-occurrence was with other terms. There are 14,431 author keywords in the dataset. We applied the minimum cutoff of 50 times appearance with 129 keywords. These terms generally fell into 3 categories: 1) The type of substance abuse. The most common substance related keywords within our dataset were “Smoking” and “tobacco”. This was followed by “alcohol”, “cocaine” and “opioids”. Four major thematic categories emerged from our analysis of these clustered terms: a) Smoking Cessation (Blue). b) Substance Abuse (Green). c) Alcohol Abuse (Red) d) Pharmacotherapy Therapy (Yellow). 2) The consequences and comorbidity of substance abuse. For example, the terms “Substance abuse disorder”, “Depression”, “Anxiety” and “Schizophrenia” frequently occurred alongside “Alcohol”. Similarly, work exploring substance abuse frequently included keywords describing consequences such as “Addiction” and “Opioid Dependence”, alongside comorbid conditions such as “HIV”, “Pregnancy”, and “quality of life”. Within the “Smoking Cessation” theme, this work frequently used terms like “craving”, “withdraw” to label work focused on related consequences “obesity” or “cardiovascular”. 3) Interventions and therapy related to substance abuse. Within our “Smoking Cessation” theme, frequently co-occurring interventions included commonly used pharmacological interventions like “Varenicline” and “Bupropion”. In contrast, “Methadone Maintenance” and “Methadone” were the only key terms related to interventions within our “Substance Abuse” theme. The co-occurrence of intervention related keywords was most common within our Alcohol Abuse theme. While being related to many key terms within the entire figure, “Treatment” was a major node within the “Alcohol Abuse” constellation. This cluster of terms included alcohol related interventions, none of which were pharmacological. These included: “Prevention”, “Mindfulness” and “Motivational Interviewing”.
